# Supplementary material for: Making patient relevant clinical research a reality
Source: HighWire-hosted journal article supplement (doi:10.1136/bmj.i6627), 2016-12-23
Supplement: bmj.i6627.pdf [file bmj.i6627.pdf]

# 促使与患者相关的临床研究成为现实

## 研究者、资助者和出版者各有分工

### Making patient relevant clinical research a reality

Researchers, funders, and publishers all have work to do

来源:BMJ 2016;355:i6627 doi: 10.1136/bmj.i6627

临床研究旨在为疾病的预防、治疗、照护及治愈提供理论基础,与此同时,在研究过程中需兼顾资金的合理使用,避免浪费研究资源<sup>1</sup>。然而,资金投入的研究领域与患者、照护人员及公众真正了解的领域有很大不同<sup>2-4</sup>。

当然,在道义上我们必需知道从研究获益人群具有优先次序。但将患者的视角更彻底地融入临床研究,能够拓宽我们的研究范围,有助于更好地解答研究的问题,极大地提升我们对疾病的认知。

目前的研究与患者及更广大的公众群体相关性较差,这背后存在着许多问题。最重要的一点就是,目前的研究处于权利等级分明的环境中。在这种金字塔般的研究环境中,权威的临床研究者处于塔尖,而患者、照护人员及公众处于塔底,属于被动受益者。在这种权利推动和维持现状的情况下,患者提出的研究想法难以得到认可,即便这些想法可能更有益于患者的福祉。这样的情况大量存在,比如伴随癌症的患病及治疗过程中出现的“脑雾(brain fog)”。“脑雾”真实存在而且频繁发生,令患者感觉十分痛苦。但在长达几十年的时间

里,研究人员和临床医生都否认这种症状的存在<sup>5-7</sup>。

另一个问题是以患者为主的研究选题常常不是那么令研究人员和资助者兴奋。矛盾在于患者所关心的干预措施是普适的,而评估这些干预措施对产业机构来说无利益可言。比如说绝大多数癌症的研究都花费大量财力致力于高价药物的试验,但这些药物对患者整体生存率的效果却微乎其微,尤其是对那些肿瘤转移的患者<sup>8</sup>。

支持性照护可改善患者的生活质量,甚至可能延长生存时间<sup>9</sup>。如果能得到充分的研究,支持性照护会给患者带来更大的益处。但很少有产业机构资助支持性照护的研究。

#### 专家咨询

很多患者久病成良医,不仅对自身健康状况相关的专业知识非常了解,而且在自我照护及症状监测等操作技术上也表现得非常专业。如果我们能够不断地发掘、利用这部分“专家”人群的资源,会为我们的研究系统注入更强的力量。要想成功做到这一点,研究人员要掌握与患者群体有效合作的技巧,而资助者则要探索更多以患者为中心的途径来分配资金。

通常来说,研究团体会尽量优先考虑和资助那些不同利益相关者关心的问题,这其中也包括患者。研究人员常抱怨难以找到可以合作的患者,但

Sally Crowe  
director<sup>1</sup>,  
Ceinwen Giles  
director of  
partnerships and  
evaluation<sup>2</sup>

<sup>1</sup>Crowe Associates,  
Thame OX9 3LW,  
UK;  
<sup>2</sup>Shine Cancer  
Support, London, UK

Correspondence to:  
S Crowe  
sally@crowe-associate  
s.co.uk

---

胡 珺 译  
包玉倩 校  
上海交通大学附属  
第六人民医院  
内分泌代谢科

社区遍布全球,其中很多社区都非常殷切地希望加入到研究人员中(比如patientslikeme.com)。现在已经可以通过网络系统为临床研究人员和患者建立潜在的联系。如果研究人员和患者之间首要关注问题不一致的矛盾能够得以解决,像詹姆林德联盟(James Lind Alliance),这样可以使聚集医生、研究人员、患者和照护人员的举措变得越来越重要。

临床研究的资助者也发挥着关键的作用。资助者总是将资金分配到“舒适区”。所谓的“舒适区”主要关注研究方案的设计及申请者的资质和能力,而非研究是否与患者相关。虽然严谨的专业能力及严谨的研究方法是关键,但不应该避开患者优先的原则。

许多基金资助机构,像英格兰国家健康研究所(NIHR),都要求研究者阐明从研究课题提出到结论推广的过程中,患者和公众是如何参与到研究中的。这是很重要的第一步,但资助者们还需进一步制定清晰的指南,以有助于提高患者参与研究的标准。研究人员在申请基金时所描述的研究方法通常存在不足,而且目前申请者也很少能得到审查、评估和反馈意见来告诉他们如何做得更好。将基金资助与明确有效的患者参与相结合,会成为巨大的动力。

最后,出版者需要传递目前急需的患者相关临床研究信息。*The BMJ*一直坚持要求作者在投稿时说明患者是如何参与研究或是未参与研究。另外杂志还开发了患者审稿的系统。如果其他的医学杂志也能这样做,那么更多的研究人员会得知患者相关研究的信息。如果资助者再加以强调,而且研究人员又能通过更好的途径与患者合作,那么研究的发展、设计和发表将发生巨大的改变。

利益竞争(Competing interests): We have read and understood BMJ policy on declaration of interests and declare that SC is the director of a commercial company that advises third parties on patient and public involvement in health services and research. CG has done paid consultancy work on patient involvement for various commercial and non-commercial organisations. SC and CG are members of The BMJ's patient panel.

来源及同行评议(Provenance and peer review): Commissioned; not externally peer reviewed.

#### 参考文献

- 1 Moher D, Glasziou P, Chalmers I, et al. Increasing value and reducing waste in biomedical research: who's listening? *Lancet* 2016;387:1573-86. doi:10.1016/S0140-6736(15)00307-4 pmid:26423180.
- 2 Tallon D, Chard J, Dieppe P. Relation between agendas of the research community and the research consumer. *Lancet* 2000;355:2037-40. doi:10.1016/S0140-6736(00)02351-5 pmid:10885355.
- 3 Crowe S, Fenton M, Hall M, Cowan K, Chalmers I. Patients', clinicians' and the research communities' priorities for treatment research: there is an important mismatch. *Res Involve Engage* 2015;1:2. doi:10.1186/s40900-015-0003-x.
- 4 Jun M, Manns B, Laupacis A, et al. Assessing the extent to which current clinical research is consistent with patient priorities: a scoping review using a case study in patients on or nearing dialysis. *Can J Kidney Health Dis* 2015;2:35. doi:10.1186/s40697-015-0070-9 pmid:26430515.
- 5 Schagen SB, Muller MJ, Boogerd W, Mellenbergh GJ, van Dam FS. Change in cognitive function after chemotherapy: a prospective longitudinal study in breast cancer patients. *J Natl Cancer Inst* 2006;98:1742-5. doi:10.1093/jnci/djj470 pmid:17148777.
- 6 Hermelink K, Untch M, Lux MP, et al. Cognitive function during neoadjuvant chemotherapy for breast cancer: results of a prospective, multicenter, longitudinal study. *Cancer* 2007;109:1905-13. doi:10.1002/encr.22610 pmid:17351951.
- 7 Ahles TA, Saykin AJ, McDonald BC, et al. Longitudinal assessment of cognitive changes associated with adjuvant treatment for breast cancer: impact of age and cognitive reserve. *J Clin Oncol* 2010;28:4434-40. doi:10.1200/JCO.2009.27.0827 pmid:20837957.
- 8 Wise PJ. Cancer drugs, survival, and ethics. *BMJ* 2016;355:i5792. doi:10.1136/bmj.i5792 pmid:27920029.
- 9 Bauman JR, Temel JS. The integration of early palliative care with oncology care: the time has come for a new tradition. *J Natl Compr Canc Netw* 2014;12:1763-71, quiz 1771 pmid:25505216.

BMJ takes no responsibility for the accuracy of the translation from the published English language original and is not liable for any errors that may occur.

# BMJ
